# Supplementary material for: Migration effects on the intestinal microbiota of Tibetans
Source: PeerJ journal article supplement (doi:10.7717/peerj.12036), 2021-10-18

(A)

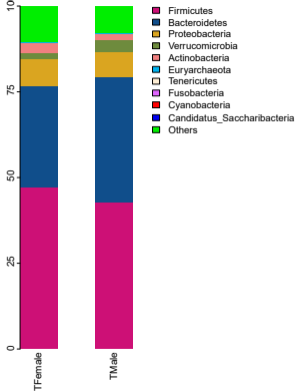

(B)

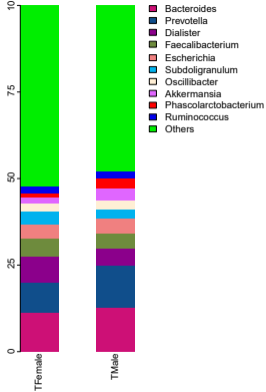

Supplement: Attached_Figure4_(composition_of_bacterial_communities).pdf [file Attached_Figure4_%28composition_of_bacterial_communities%29.pdf]
