# Supplementary material for: Migration effects on the intestinal microbiota of Tibetans
Source: PubMed Central journal article supplement (PMC8530097; doi:10.7717/peerj.12036), 2021-10-18

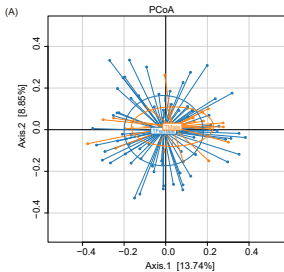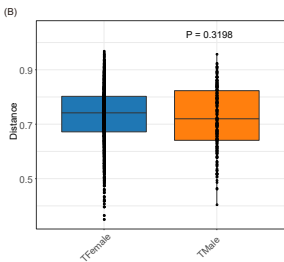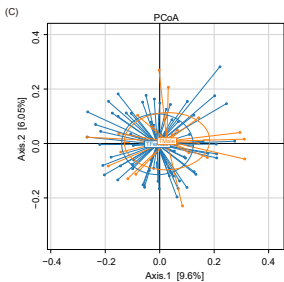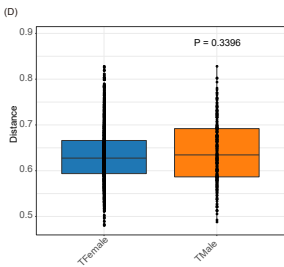

Supplement: peerj-09-12036-s003.pdf [file peerj-09-12036-s003.pdf]
